# Supplementary material for: Modelling the impact of larviciding on the population dynamics and biting rates of Simulium damnosum (s.l.): implications for vector control as a complementary strategy for onchocerciasis elimination in Africa
Source: PubMed Central journal article supplement (PMC5972405; doi:10.1186/s13071-018-2864-y), 2018-05-29
Supplement: 13071_2018_2864_MOESM1_ESM.pdf [file 13071_2018_2864_MOESM1_ESM.pdf]

# Modelling the impact of larviciding on the population dynamics and biting rates of *Simulium damnosum* s.l.: implications for vector control as a complementary strategy for onchocerciasis elimination in Africa

Isobel Routledge<sup>1</sup>, Martin Walker<sup>2,3</sup>, Robert A. Cheke<sup>3,4</sup>, Samir Bhatt<sup>1</sup>, Pierre Baleguel Nkot<sup>5</sup>, Graham A. Matthews<sup>6</sup>, Didier Baleguel<sup>5</sup>, Hans M. Dobson<sup>4</sup>, Terry L. Wiles<sup>5,6</sup>, Maria-Gloria Basañez<sup>1,3,\*</sup>

1 MRC Centre for Outbreak Analysis and Modelling, Faculty of Medicine, Department of Infectious Disease Epidemiology, Imperial College London, London, UK

2 London Centre for Neglected Tropical Disease Research, Department of Pathobiology and Population Sciences, Royal Veterinary College, Hatfield, UK

3 London Centre for Neglected Tropical Disease Research, Faculty of Medicine, Department of Infectious Disease Epidemiology, Imperial College London, London, UK

4 Natural Resources Institute, Department of Agriculture, Health & Environment, University of Greenwich, Chatham, UK

5 Yaoundé Initiative Foundation, Yaoundé, Cameroon

6 Yaoundé Initiative Foundation, Faculty of Natural Sciences, Department of Life Sciences (Silwood Park), Imperial College London, London UK

\*Corresponding author: Maria-Gloria Basañez ([m.basanez@imperial.ac.uk](mailto:m.basanez@imperial.ac.uk))

## Additional file 1

Description of the calculation of carrying capacity, approximate Bayesian computation (ABC) methods and sensitivity/scenario analysis

### Contents

1. Re-estimating carrying capacity,  $K$
2. Description of approximate Bayesian computation for parameter estimation
3. Sensitivity of model to changes in parameter values
4. Pairs plots of parameter values
5. Results of scenario analysis
6. Supplementary references

## 1. Re-estimating carrying capacity, $K$

Due to the extension of the original model described in Cheke et al. [1] to include additional larval instar stages, an expression for the carrying capacity was re-derived by solving the model presented in the equations (1) to (5) of the main text at equilibrium, i.e.,

$$\frac{dE}{dt} = \frac{dL_i}{dt} = \frac{dP}{dt} = \frac{dN}{dt} = \frac{d\Psi}{dt} = 0, \text{ to obtain steady state solutions } (E^*, L_i^*, P^*, N^*, \Psi^*).$$

In the following we omit the time and temperature dependencies to simplify notation.

$$\frac{d\Psi}{dt} = 0 \Rightarrow N^* = g \bar{\mu}_V \Psi^*$$

$$\frac{dN}{dt} = 0 \Rightarrow P^* = 2\Delta_P (1 + g \bar{\mu}_V) \bar{\mu}_V \Psi^*$$

$$\frac{dP}{dt} = 0 \Rightarrow L_7^* = \left( \frac{\Delta_L}{7} \right) \left( \frac{1}{\Delta_P} + \mu_P \right) P^*$$

Substituting  $P^*$ ,

$$\frac{dP}{dt} = 0 \Rightarrow L_7^* = 2 \left( \frac{\Delta_L}{7} \right) (1 + \Delta_P \mu_P) (1 + g \bar{\mu}_V) \bar{\mu}_V \Psi^*$$

$$\frac{dL_{i+1}}{dt} = 0 \Rightarrow L_i^* = \left[ 1 + \left( \frac{\Delta_L}{7} \right) (\mu_L^0 + \mu_L^1) \right] L_{i+1}^* \quad 1 \leq i \leq 6$$

$$\frac{dL_1}{dt} = 0 \Rightarrow E^* = 2\Delta_E \left[ 1 + \left( \frac{\Delta_L}{7} \right) (\mu_L^0 + \mu_L^1) \right]^7 (1 + \Delta_P \mu_P) (1 + g \bar{\mu}_V) \bar{\mu}_V \Psi^*$$

$$\text{Let } \omega = 2\Delta_E \left[ 1 + \left( \frac{\Delta_L}{7} \right) (\mu_L^0 + \mu_L^1) \right]^7 (1 + \Delta_P \mu_P) (1 + g \bar{\mu}_V) \bar{\mu}_V$$

$$\frac{dE}{dt} = 0 \Rightarrow N^* \beta_N + \Psi^* \beta_P = \frac{E^*}{\Delta_E} + \mu_E^0 \left( 1 + \frac{E^*}{K} \right) E^*$$

$$E^* = \omega \Psi^*$$

$$N^* = g \bar{\mu}_V \Psi^*$$

Re-arranging to obtain expressions for the equilibrium number of parous flies, nullipars and total adult female flies, and the expression for carrying capacity as a function of the equilibrium number of flies,

$$\Psi^* = \frac{K \left[ \beta_N g \bar{\mu}_V + \beta_P - \left( \frac{\omega}{\Delta_E} \right) - \mu_E^0 \omega \right]}{\mu_E^0 \omega^2}$$

$$N^* = \frac{K g \bar{\mu}_V \left[ \beta_N g \bar{\mu}_V + \beta_P - \left( \frac{\omega}{\Delta_E} \right) - \mu_E^0 \omega \right]}{\mu_E^0 \omega^2}$$

$$V^* = N^* + \Psi^* = \frac{K (1 + g \bar{\mu}_V) \left[ \beta_N g \bar{\mu}_V + \beta_P - \left( \frac{\omega}{\Delta_E} \right) - \mu_E^0 \omega \right]}{\mu_E^0 \omega^2}$$

$$K = \frac{V^* \mu_E^0 \omega^2}{(1 + g \bar{\mu}_V) \left[ \beta_N g \bar{\mu}_V + \beta_P - \left( \frac{\omega}{\Delta_E} \right) - \mu_E^0 \omega \right]}$$

For a given baseline egg mortality  $\mu_E^0$  we can calculate the egg mortality at equilibrium density  $\mu_E(E^*)$  (i.e. after the excess mortality due to density dependence has taken place) as follows,

$$\mu_E(E^*) = \mu_E^0 \left( 1 + \frac{E^*}{K} \right) = \mu_E^0 \left( 1 + \frac{\omega \Psi^*}{K} \right) = \mu_E^0 \left[ 1 + \frac{\beta_N g \bar{\mu}_V + \beta_P - \left( \frac{\omega}{\Delta_E} \right) - \omega \mu_E^0}{\omega \mu_E^0} \right] =$$

$$= \left( \frac{\beta_N g \bar{\mu}_V}{\omega} \right) + \left( \frac{\beta_P}{\omega} \right) - \left( \frac{1}{\Delta_E} \right)$$

Note that this expression is independent of  $\mu_E^0$ , and therefore, density-dependent egg mortality will stabilize the blackfly population regardless of the value of the baseline egg mortality rate.

## 2. Description of approximate Bayesian computation for parameter estimation

Parameter estimation was undertaken using an approximate Bayesian computation (ABC) technique implemented using the `abc` package in the R programming environment. A detailed description of ABC methods is given in the published package description [2] and summarised here for clarity. Approximate Bayesian computation techniques approximate the posterior probability distribution of a set of parameters, here referred to generically as  $\theta$ . A set of parameter values  $\theta_i$  is sampled from its prior distribution to simulate a new data set  $D_i$ . This is repeated  $n$  times to generate  $D_1, D_2, \dots, D_n$  datasets. A single summary statistic or  $S(D_i)$  (or a set of summary statistics) is computed from each simulated dataset and compared to the summary statistics obtained from the actual data  $S(D_0)$  using a Euclidean distance measure,  $d$ . Here our summary statistic (calculated for the real and simulated datasets) was the Poisson negative likelihood of either the observed or simulated data. The goal of ABC is to select only parameter sets that yield distance measures between observed and simulated datasets that are below a threshold (i.e. the simulated data are suitably close to the observed data). This threshold is defined by a tolerance rate which determines the percentage of samples which are accepted. We used a tolerance of 0.3 from 1,500 simulations of 8 parameters drawn from independent prior distributions. The accepted simulations are considered a sample from the approximate posterior distribution.

The version of ABC inference used for this analysis also employs a *post hoc* machine learning regression technique to improve the approximation of the posterior. In particular, we made use of neural networks [3] to correct for the imperfect match between the accepted,  $S(D_i)$ , and observed summary statistics (likelihoods),  $S(D_0)$ , using the following non-linear regression equation,

$$\theta_i = m(S(D_i)) + \epsilon_i$$

Here  $m$  represents a non-linear regression function based on the nnet package [4], which fits a specified number of neural networks (we used the default 10 networks) and takes the median value and  $\epsilon_i$ , a random error with variance  $\sigma$ . Parameter sets that closely match the target summary statistics (i.e. have a small random error term) are given more weight. A weighted sample from the posterior distribution is then obtained from the  $\theta_i$ s, having been corrected using the estimate  $\hat{m}(\cdot)$  and  $\hat{\epsilon}_i$  [5]. We also applied a correction for heteroscedasticity,

$$\theta_i^* = \hat{m}(S(D_0)) + \frac{\hat{\sigma}(S(D_0))}{\hat{\sigma}(S(D_i))} \hat{\epsilon}_i$$

where  $\hat{\sigma}(\cdot)$  is the estimated conditional standard deviation [3]. Using a single summary statistic (as employed here),  $\hat{\sigma}(S(D_0)) = 0$  and therefore  $\theta_i^* = \hat{m}(S(D_0))$ .

### 3. Sensitivity of model to changes in parameter values

**Table S1** Parameters varied in sensitivity analysis

| Parameter                  | Values considered |      |       |      |       |
|----------------------------|-------------------|------|-------|------|-------|
| $\bar{\mu}_V$              | 0.05              | 0.1  | 0.15  | 0.2  | 0.25  |
| $\epsilon_L$               | 0.5               | 0.7  | 0.8   | 0.93 | 0.995 |
| $\mu_P$                    | 0                 | 0.05 | 0.1   | 0.15 | –     |
| $\mu_L^0$                  | 0.225             | 0.25 | 0.275 | 0.3  | –     |
| $g$                        | 2.5               | 3    | 3.5   | 4    | –     |
| $T$                        | 25                | 26   | 27    | 28   | –     |
| $T_w^a$                    | 23.6              | 24.6 | 25.5  | 26.5 | –     |
| <b>DBR</b>                 | 100               | 300  | 500   | 700  | 900   |
| $\left(\frac{H}{h}\right)$ | 50                | 100  | 200   | 400  | 800   |

$$^a T_w = 0.9844 T - 1.0352.$$

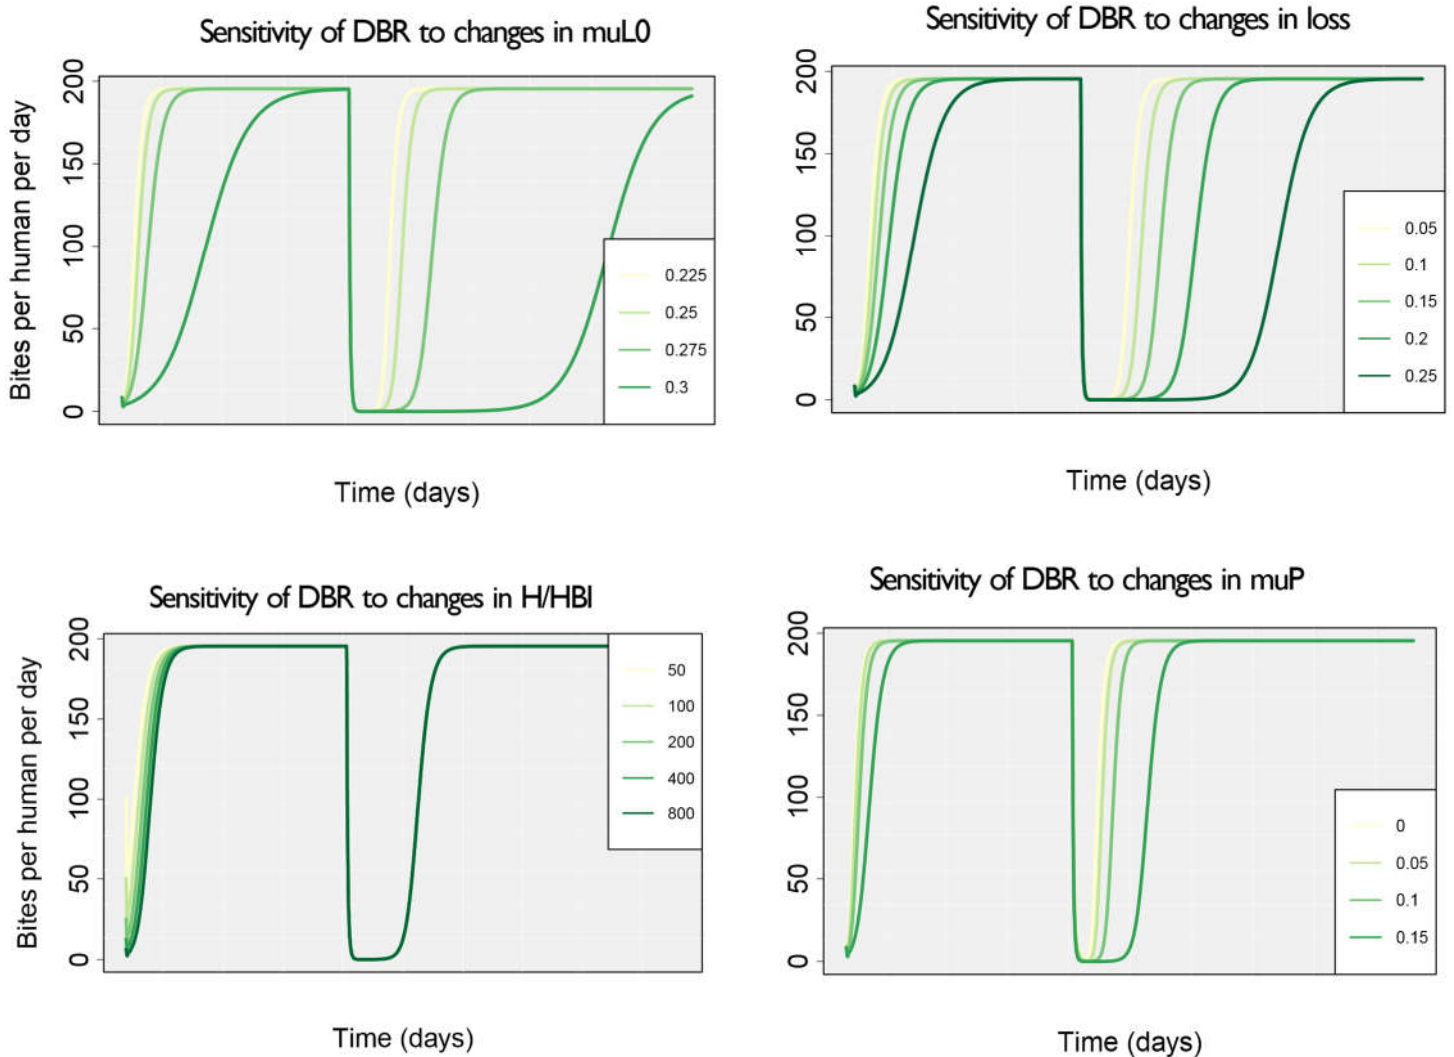

**Figure S1** Sensitivity of model output to other parameters not included in Fig 4 of the main text.

#### 4. Pairs plots of parameter estimates

We calculated pairs plots for the 8 estimated parameter values to identify any significant correlations (Figure S2). For *S. squamosum* B/*S. yahense* forest contexts, a negative correlation between the adult loss function and baseline larval mortality was observed. This is because no relationship between temperature and adult mortality is known for this context, so baseline larval mortality and adult mortality are not fully identifiable.

**a** *S. damnosum* s.s./*S. sirbanum* (savannah)

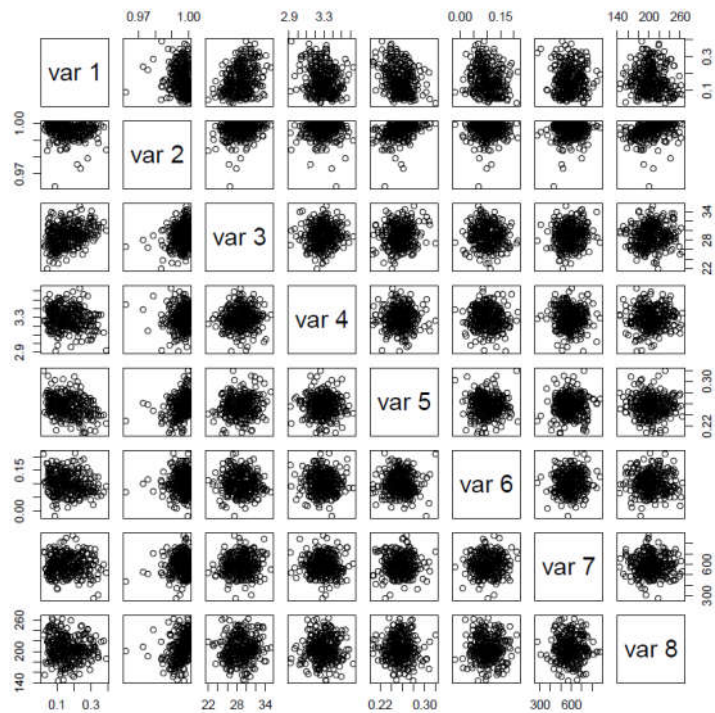

**b** *S. squamosum* B/*S. yahense* (forest)

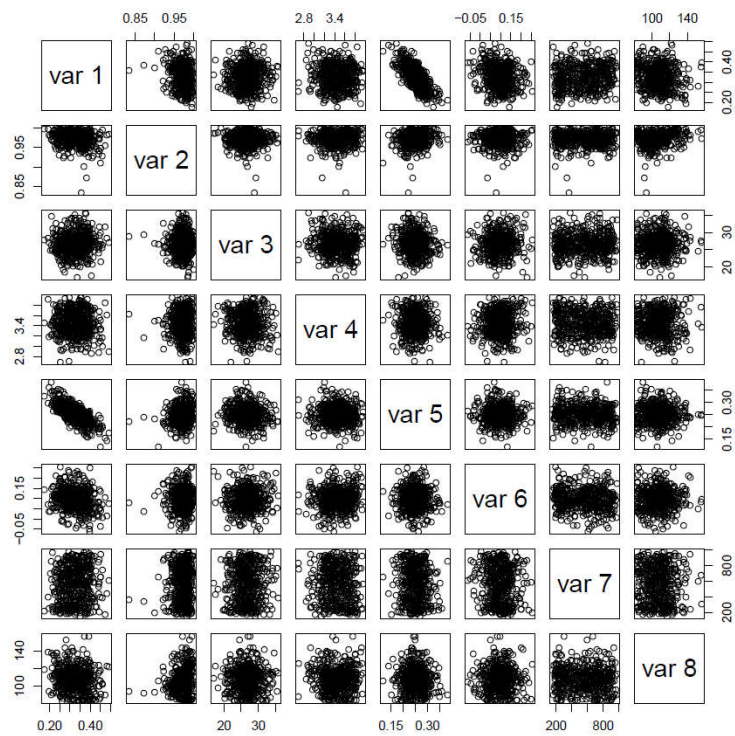

**Figure S2** Pairs plots of estimated parameter values for **a)** *S. damnosum* s.s./*S. sirbanum* (savannah) and **b)** *S. squamosum* B/*S. yahense* (forest). Parameters are denoted as

follows: var 1, per capita loss rate of adult female flies,  $\bar{\mu}_v$ ; var 2, larvicidal efficacy,  $\varepsilon_L$ ; var 3, air temperature,  $T$ ; var 4, length of gonotrophic cycle,  $g$ ; var 5, pre-intervention (baseline) larval mortality rate,  $\mu_L^0$ ; var 6, per capita pupal mortality rate,  $\mu_p$ ; var 7, human population density/human blood index,  $H/h$ ; var 8, pre-intervention (baseline) daily biting rate,  $DBR^*$ .



## 5. Results of scenario analysis

**Table S1** Proportion of bites averted when varying larvicidal efficacy, number of treatments and interval between treatments for the savannah- and forest- parameterised SIMPOP model

| Number of treatments |                 | 4                |                  | 6                |                  | 8                |                  | 10               |                  |
|----------------------|-----------------|------------------|------------------|------------------|------------------|------------------|------------------|------------------|------------------|
| Context              |                 | sav <sup>a</sup> | for <sup>b</sup> | sav <sup>a</sup> | for <sup>b</sup> | sav <sup>a</sup> | for <sup>b</sup> | sav <sup>a</sup> | for <sup>b</sup> |
| Efficacy (%)         | Interval (days) |                  |                  |                  |                  |                  |                  |                  |                  |
| 99                   | 7               | 0.4489           | NA               | 0.5654           | NA               | 0.6406           | NA               | 0.6939           | NA               |
|                      | 14              | 0.3879           | NA               | 0.4807           | NA               | 0.5464           | NA               | 0.5952           | NA               |
|                      | 21              | 0.3977           | NA               | 0.4943           | NA               | 0.5609           | NA               | 0.6110           | NA               |
| 96                   | 7               | NA               | 0.4184           | NA               | 0.4985           | NA               | 0.5568           | NA               | 0.6015           |
|                      | 14              | NA               | 0.3821           | NA               | 0.4517           | NA               | 0.5019           | NA               | 0.5428           |
|                      | 21              | NA               | 0.3766           | NA               | 0.4416           | NA               | 0.4879           | NA               | 0.5223           |
| 93                   | 7               | 0.3431           | 0.3740           | 0.4144           | 0.4500           | 0.4687           | 0.5057           | 0.5119           | 0.5500           |
|                      | 14              | 0.3178           | 0.3454           | 0.3812           | 0.4103           | 0.4283           | 0.4574           | 0.4656           | 0.4961           |
|                      | 21              | 0.3099           | 0.3353           | 0.3659           | 0.3939           | 0.4056           | 0.4358           | 0.4356           | 0.4658           |
| 70                   | 7               | 0.2051           | 0.2147           | 0.2547           | 0.2628           | 0.2944           | 0.3020           | 0.3270           | 0.3342           |
|                      | 14              | 0.1888           | 0.1949           | 0.2277           | 0.2333           | 0.2572           | 0.2618           | 0.2797           | 0.2835           |
|                      | 21              | 0.1757           | 0.1806           | 0.2056           | 0.2097           | 0.2260           | 0.2288           | 0.2403           | 0.2434           |

<sup>a</sup> savannah; <sup>b</sup> forest.

**Table S2** Proportional reduction in DBR when varying larvicidal efficacy, number of treatments and interval between treatments for the savannah- and forest- parameterised SIMPOP model

| <b>Number of treatments</b> |                 | <b>4</b>                |                         | <b>6</b>                |                         | <b>8</b>                |                         | <b>10</b>               |                         |
|-----------------------------|-----------------|-------------------------|-------------------------|-------------------------|-------------------------|-------------------------|-------------------------|-------------------------|-------------------------|
| <i>Context</i>              |                 | <i>sav</i> <sup>a</sup> | <i>for</i> <sup>b</sup> | <i>sav</i> <sup>a</sup> | <i>for</i> <sup>b</sup> | <i>sav</i> <sup>a</sup> | <i>for</i> <sup>b</sup> | <i>sav</i> <sup>a</sup> | <i>for</i> <sup>b</sup> |
| Efficacy (%)                | Interval (days) |                         |                         |                         |                         |                         |                         |                         |                         |
| 99                          | 7               | 0.9701                  | NA                      | 0.9919                  | NA                      | 0.9977                  | NA                      | 0.9993                  | NA                      |
|                             | 14              | 0.7919                  | NA                      | 0.8489                  | NA                      | 0.8781                  | NA                      | 0.8953                  | NA                      |
|                             | 21              | 0.7165                  | NA                      | 0.75803                 | NA                      | 0.7761                  | NA                      | 0.7847                  | NA                      |
| 96                          | 7               | NA                      | 0.8921                  | NA                      | 0.9506                  | NA                      | 0.9758                  | NA                      | 0.9877                  |
|                             | 14              | NA                      | 0.706                   | NA                      | 0.7779                  | NA                      | 0.8172                  | NA                      | 0.8413                  |
|                             | 21              | NA                      | 0.6227                  | NA                      | 0.6734                  | NA                      | 0.6973                  | NA                      | 0.7095                  |
| 93                          | 7               | 0.8382                  | 0.82582                 | 0.9068                  | 0.9026                  | 0.941                   | 0.9412                  | 0.9604                  | 0.9629                  |
|                             | 14              | 0.6217                  | 0.6331                  | 0.6789                  | 0.7042                  | 0.7068                  | 0.7427                  | 0.7216                  | 0.7659                  |
|                             | 21              | 0.5092                  | 0.5392                  | 0.5385                  | 0.5837                  | 0.5489                  | 0.6033                  | 0.5526                  | 0.6126                  |
| 70                          | 7               | 0.5091                  | 0.4612                  | 0.5923                  | 0.5527                  | 0.6421                  | 0.6093                  | 0.6739                  | 0.6477                  |
|                             | 14              | 0.3357                  | 0.3197                  | 0.3719                  | 0.3692                  | 0.3879                  | 0.38627                 | 0.3951                  | 0.398                   |
|                             | 21              | 0.2466                  | 0.2434                  | 0.2601                  | 0.2632                  | 0.264                   | 0.2703                  | 0.2652                  | 0.273                   |

<sup>a</sup> savannah; <sup>b</sup> forest.

**Table S3** Time to bounce-back (days) of adult fly population when varying larvicidal efficacy, number of treatments and interval between treatments for the savannah- and forest-parameterised SIMPOP model

| <b>Number of treatments</b> |                 | <b>4</b>               |                        | <b>6</b>               |                        | <b>8</b>               |                        | <b>10</b>              |                        |
|-----------------------------|-----------------|------------------------|------------------------|------------------------|------------------------|------------------------|------------------------|------------------------|------------------------|
| <i>Context</i>              |                 | <i>sav<sup>a</sup></i> | <i>for<sup>b</sup></i> | <i>sav<sup>a</sup></i> | <i>for<sup>b</sup></i> | <i>sav<sup>a</sup></i> | <i>for<sup>b</sup></i> | <i>sav<sup>a</sup></i> | <i>for<sup>b</sup></i> |
| Efficacy (%)                | Interval (days) |                        |                        |                        |                        |                        |                        |                        |                        |
| 99                          | 7               | 175                    | NA                     | 199                    | NA                     | 223                    | NA                     | 244                    | NA                     |
|                             | 14              | 142                    | NA                     | 150                    | NA                     | 154                    | NA                     | 158                    | NA                     |
|                             | 21              | 130                    | NA                     | 135                    | NA                     | 137                    | NA                     | 138                    | NA                     |
| 96                          | 7               | NA                     | 160                    | NA                     | 181                    | NA                     | 199                    | NA                     | 190                    |
|                             | 14              | NA                     | 134                    | NA                     | 144                    | NA                     | 151                    | NA                     | 142                    |
|                             | 21              | NA                     | 121                    | NA                     | 127                    | NA                     | 130                    | NA                     | 120                    |
| 93                          | 7               | 143                    | 147                    | 156                    | 164                    | 165                    | 178                    | 173                    | 190                    |
|                             | 14              | 122                    | 124                    | 128                    | 133                    | 131                    | 139                    | 132                    | 142                    |
|                             | 21              | 109                    | 111                    | 112                    | 116                    | 113                    | 118                    | 113                    | 120                    |
| 70                          | 7               | 108                    | 99                     | 116                    | 111                    | 121                    | 118                    | 125                    | 123                    |
|                             | 14              | 91                     | 83                     | 96                     | 89                     | 97                     | 92                     | 98                     | 94                     |
|                             | 21              | 78                     | 69                     | 80                     | 72                     | 81                     | 74                     | 81                     | 74                     |

<sup>a</sup> savannah; <sup>b</sup> forest.

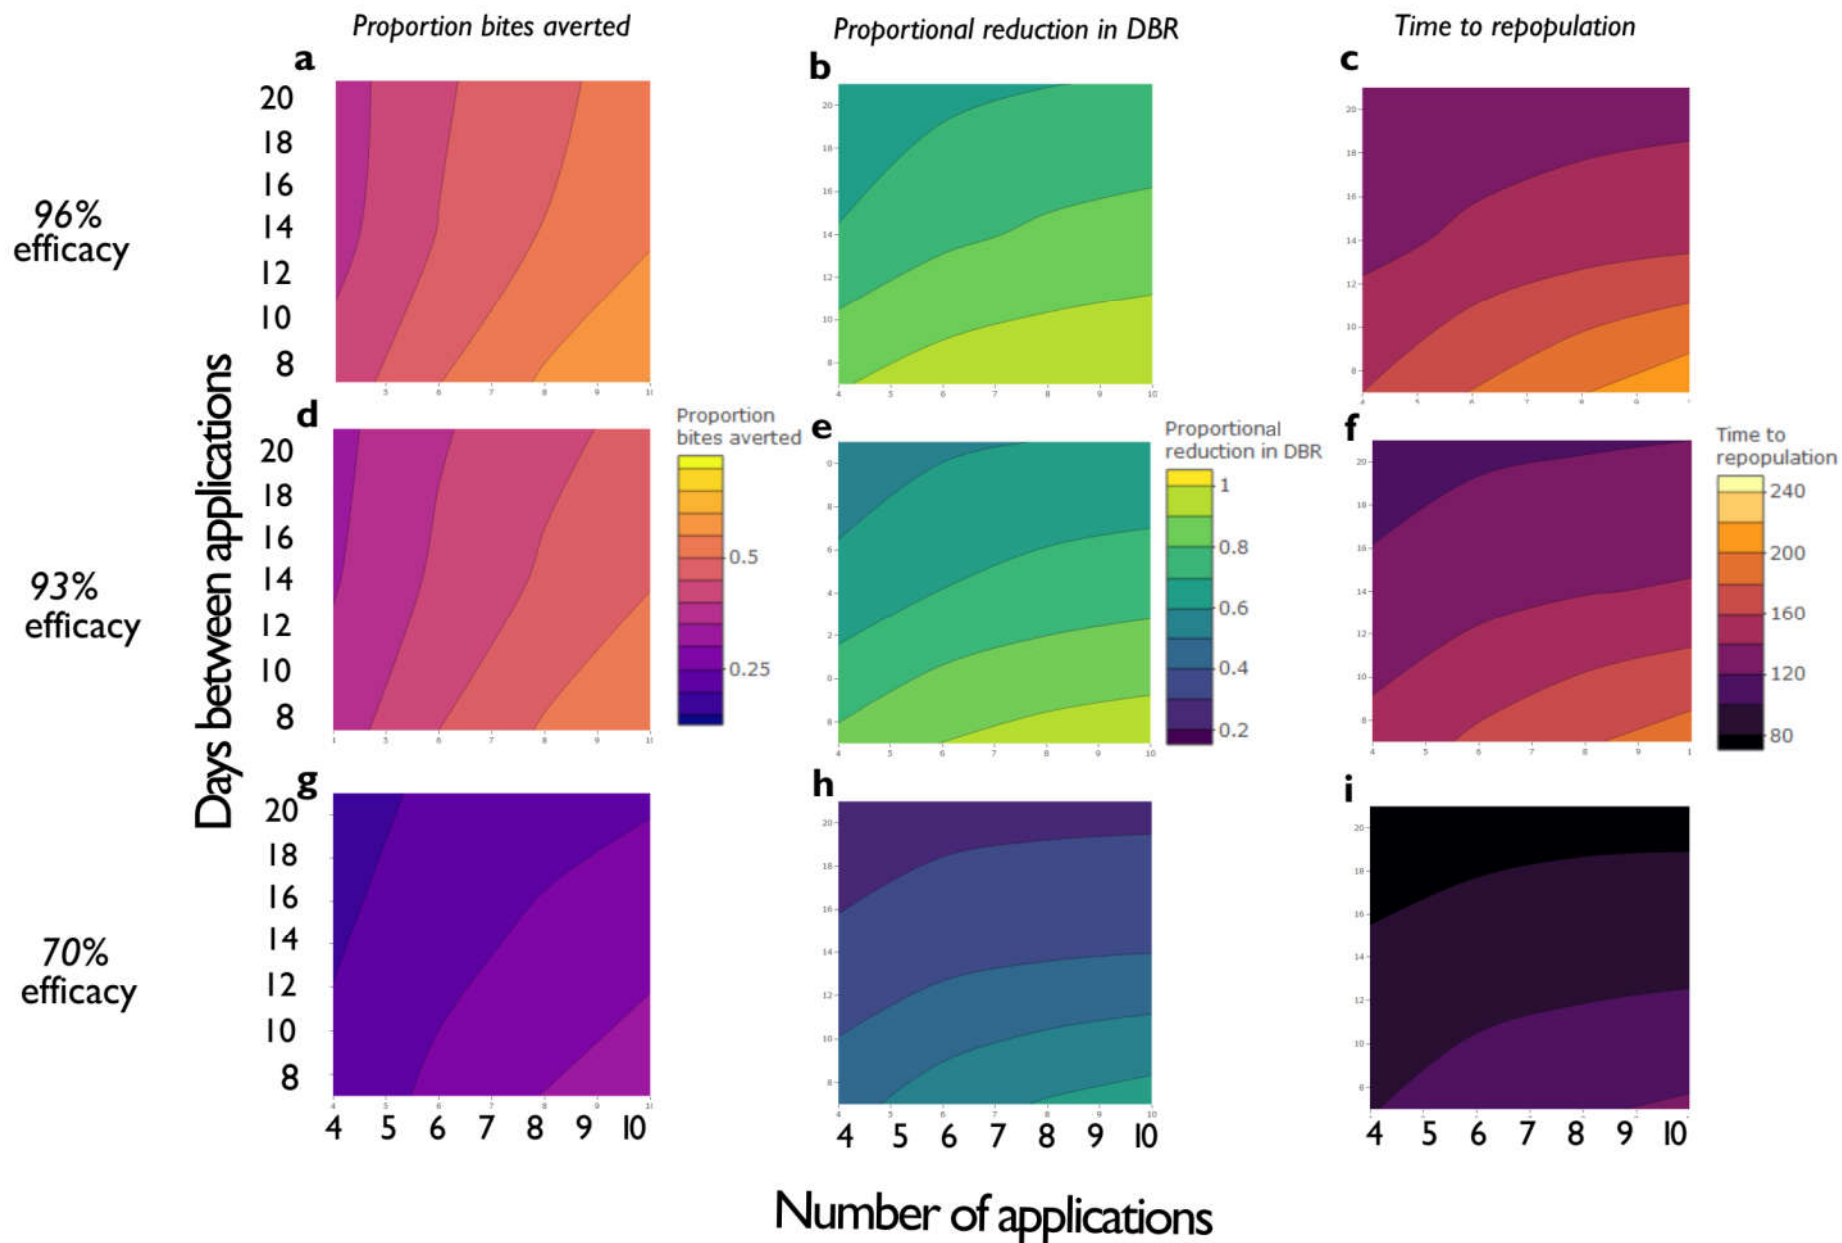

### **Figure S3** Scenario analysis (forest settings)

Impact of varying the number of larvicide applications (horizontal axes) and the interval between applications (in days, vertical axes) on three measures of effectiveness: 1) the proportion of bites averted during the intervention (vertical left-hand panels); 2) the proportional reduction in *DBR* (vertical middle panels); 3) the time taken to return to pre-intervention baseline *DBRs* (vertical right-hand panels). In **a**) and **b**) and **c**) larvicidal efficacy is 96%. In **d**), **e**) and **f**) the results for 93% efficacy are presented. In **g**), **h**), and **i**) larvicidal efficacy is 70%. (For precise definitions of the effectiveness measurements see section on Scenario analysis in the main text. Equivalent results for the savannah settings are presented in Fig 3 of the main text.

## **6. Supplementary references**

1. Cheke RA, Basáñez MG, Perry M, White MT, Garms R, Obuobie E, et al. Potential effects of warmer worms and vectors on onchocerciasis transmission in West Africa. *Philos. Trans. R. Soc. Lond. B. Biol. Sci.* 2015;370(1665):20130559.
2. Csilléry K, François O, Blum MGB. *abc*: An R package for approximate Bayesian computation (ABC). *Methods Ecol. Evol.* 2012;3(3):475–79.
3. Blum MGB, François O. Non-linear regression models for Approximate Bayesian Computation. *Stat Comput.* 2010;20(1):63–73.
4. Venables WN, Ripley BD. *Modern Applied Statistics with S-PLUS*. Springer Science & Business Media; 2013.
5. Beaumont MA, Zhang W, Balding DJ. Approximate Bayesian computation in population genetics. *Genetics.* 2002;162(4):2025–35.
